# Supplementary material for: 250 years of hybridization between two biennial herb species without speciation
Source: PubMed Central journal article supplement (PMC4571729; doi:10.1093/aobpla/plv081), 2015-07-17

## SUPPORTING INFORMATION

The following Supporting Information is available in the online version of this article.

**File 1: Figure S1.** Maximum Likelihood ITS tree of the genus *Tragopogon* showing hybrid samples forming a clade with *T. porrifolius*. Samples from the present study have a four-digit ID number in their label.

**File 2: Figure S2.** Maximum Likelihood ETS tree of the genus *Tragopogon* showing hybrid samples forming a clade with *T. pratensis*, and unexpected placement of the accession labelled *T. porrifolius* from the Paris herbarium. Samples from the present study have a four-digit ID number in their label.

**File 3: Table S1.** List of herbarium specimens deposited at the British Museum Herbarium with accession numbers.

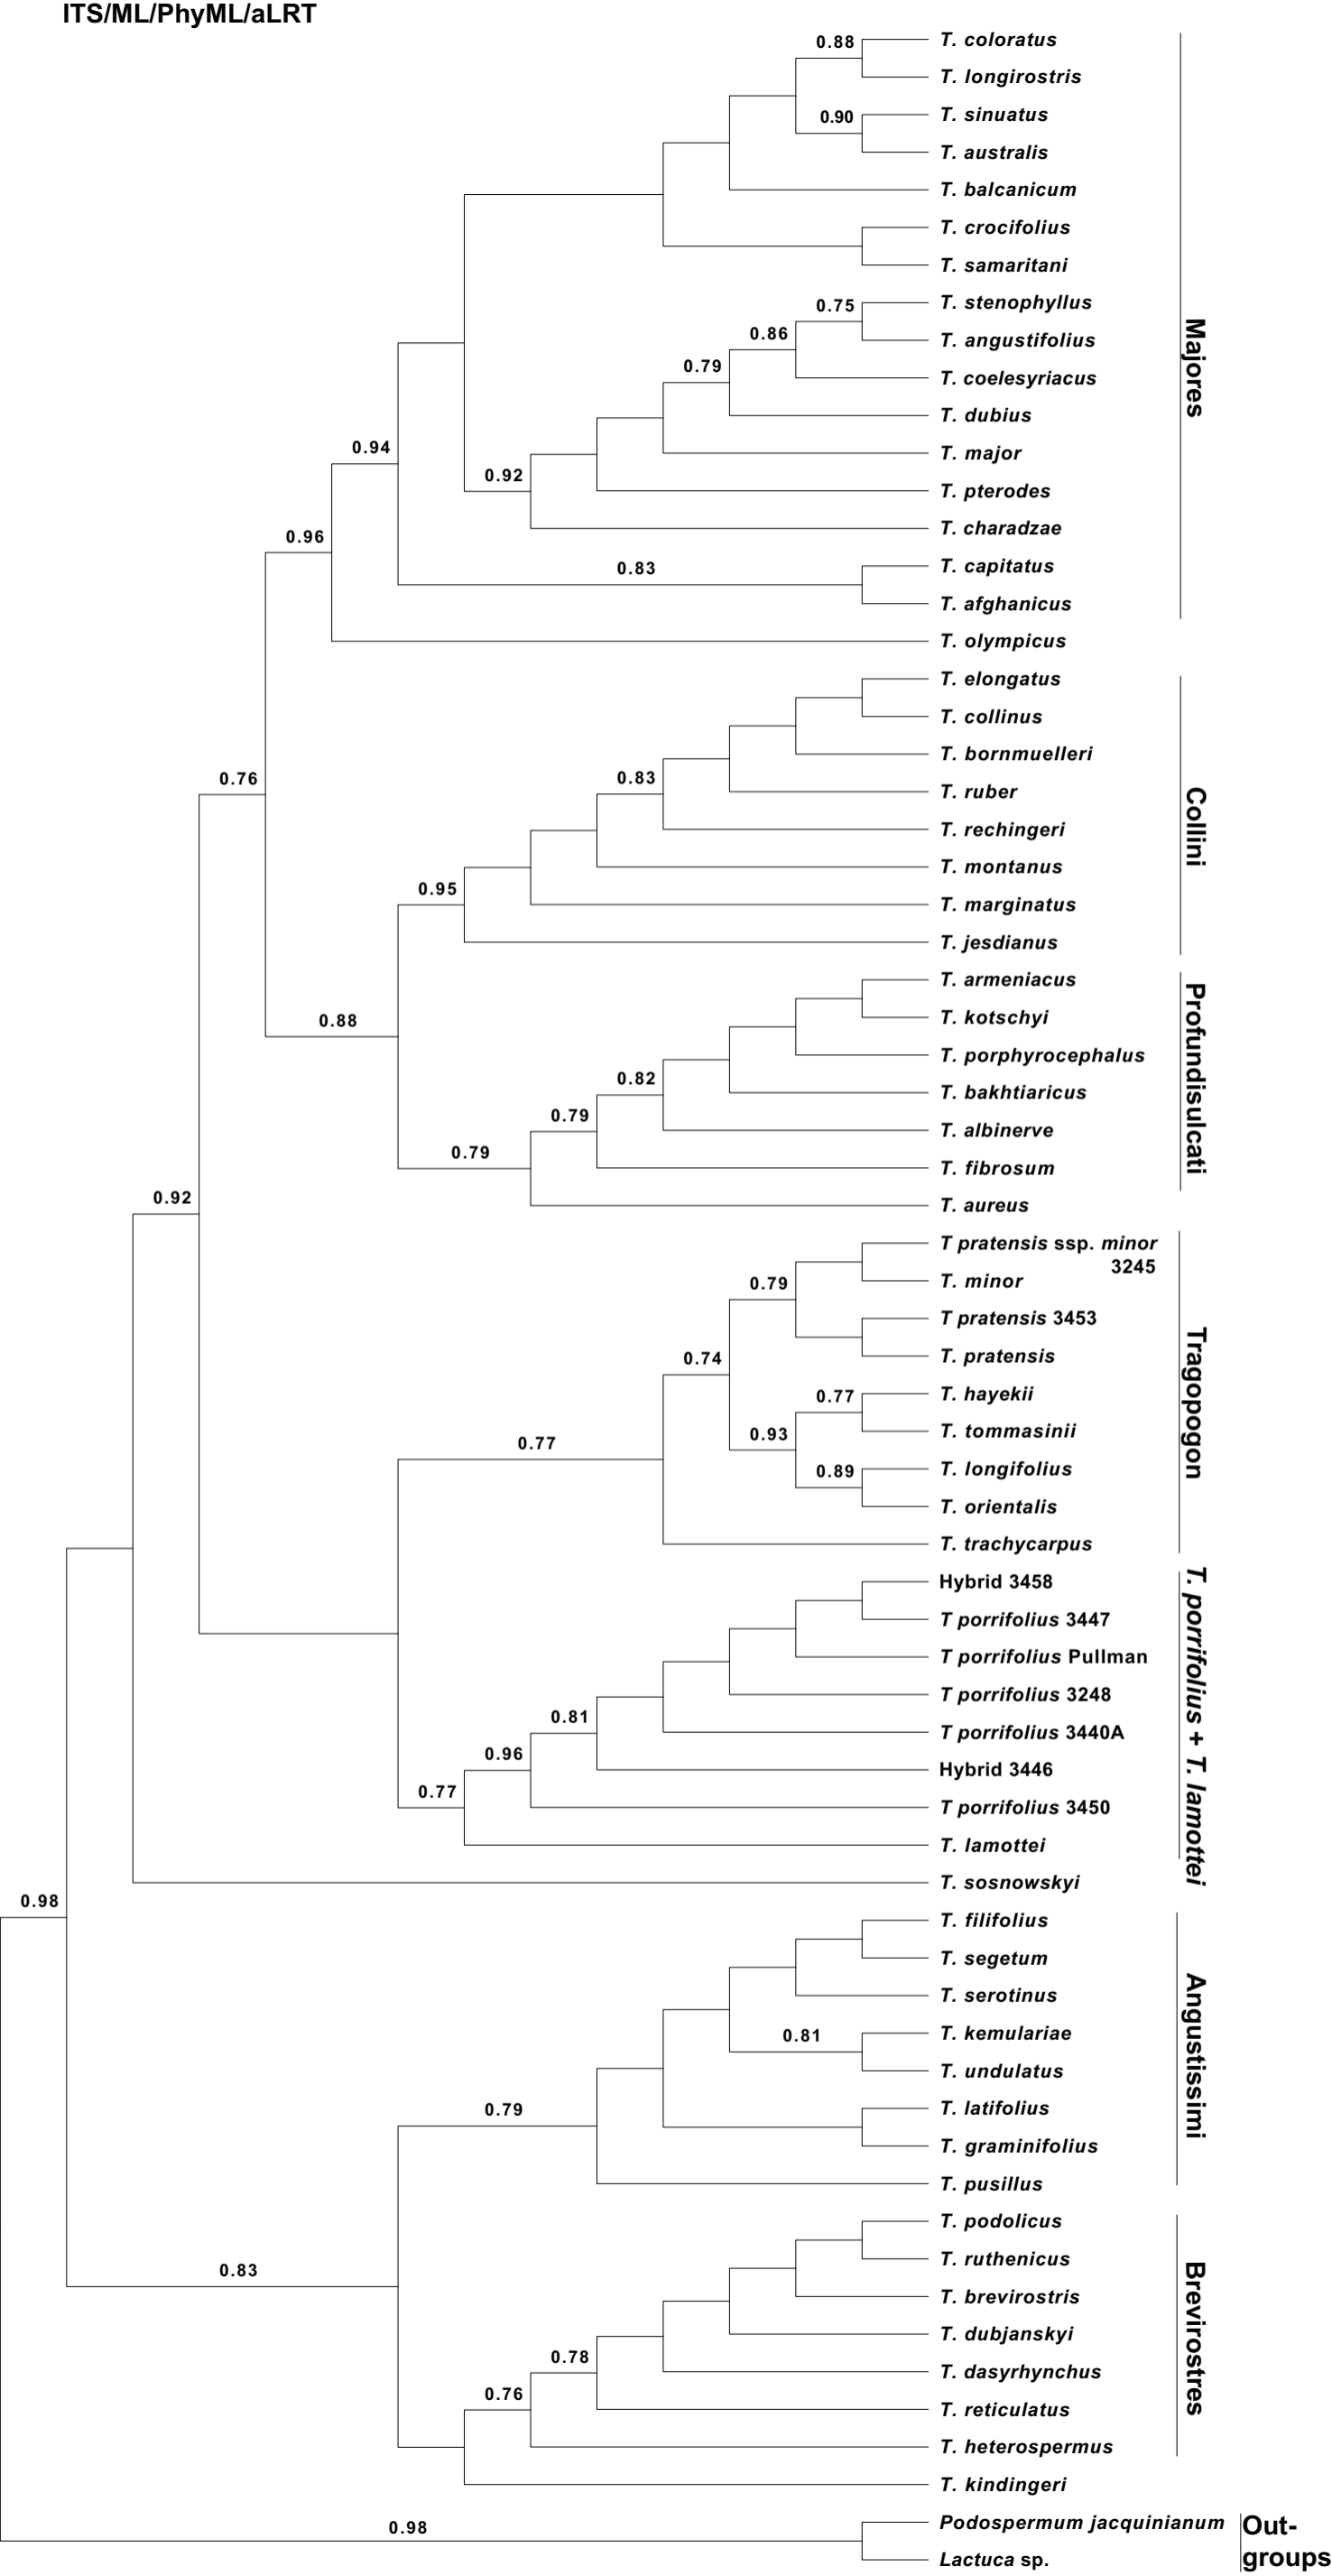

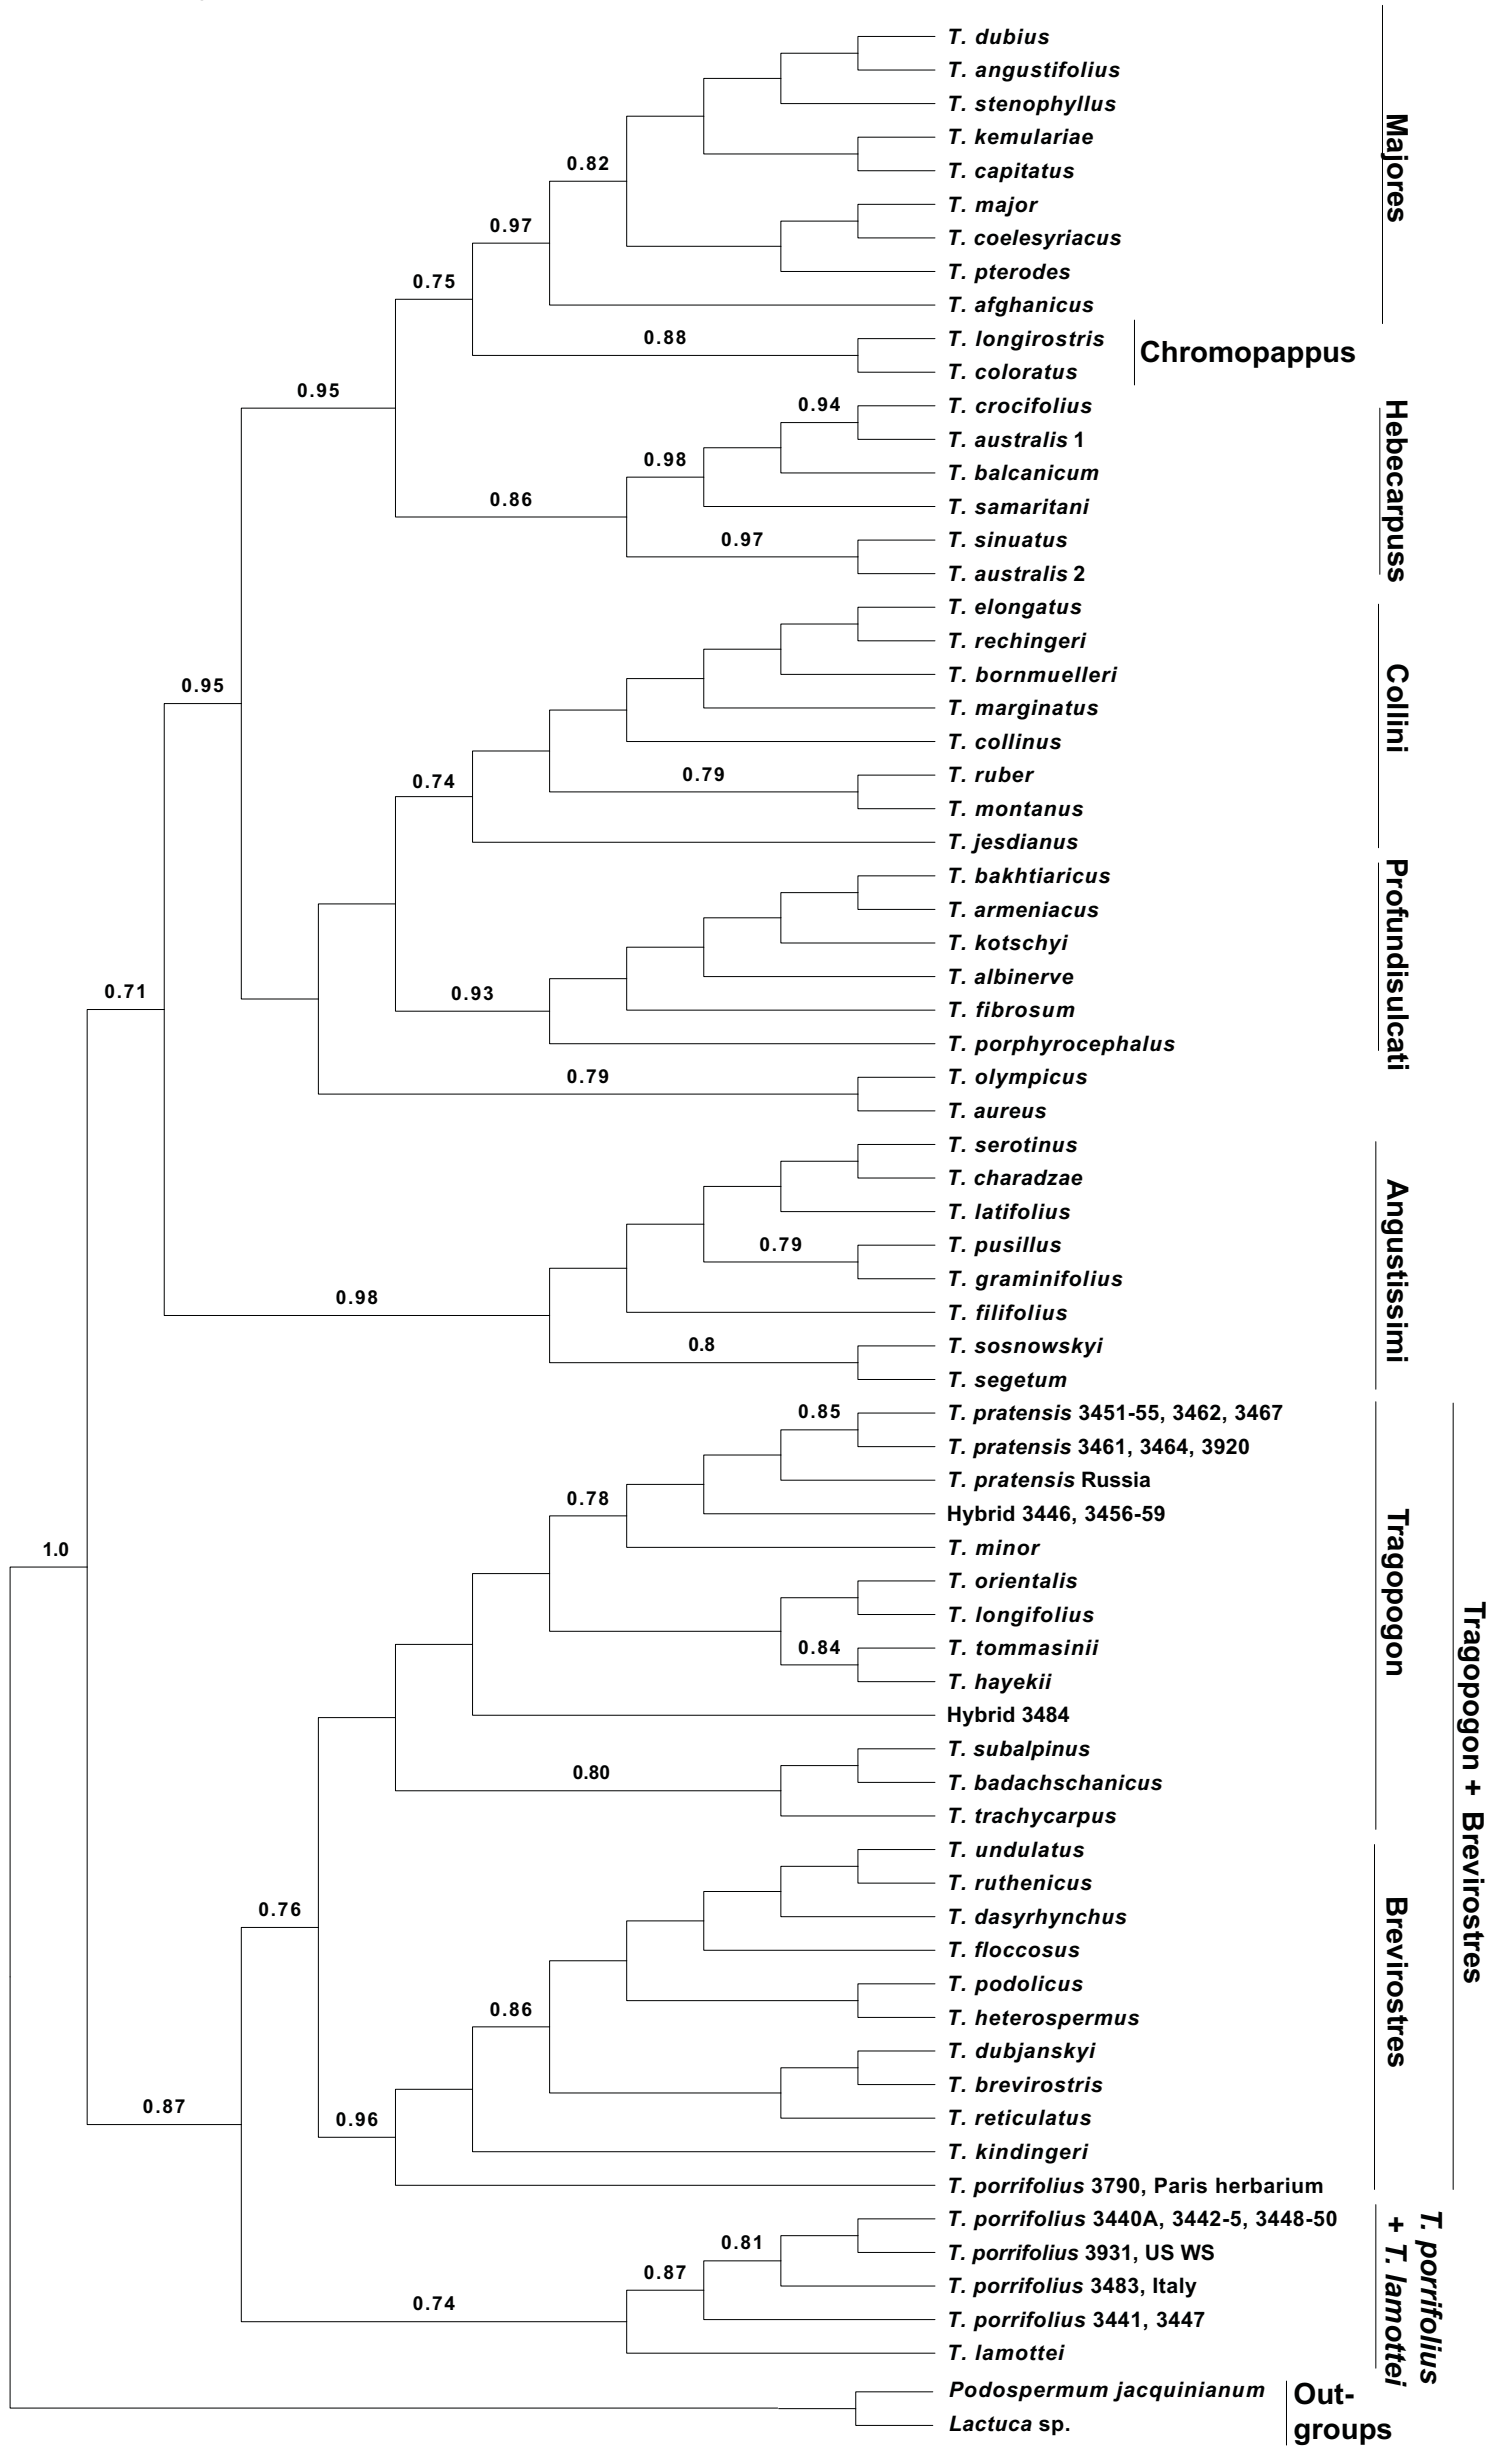

Supplement: supp_plv081_plv081supp_figs.pdf [file supp_plv081_plv081supp_figs.pdf]
